# Supplementary material for: RNA-Mediated Gene Silencing Signals Are Not Graft Transmissible from the Rootstock to the Scion in Greenhouse-Grown Apple Plants Malus sp
Source: Int J Mol Sci. 2012 Aug 10;13(8):9992–10009. doi: 10.3390/ijms13089992 (PMC3431842; doi:10.3390/ijms13089992)

# RNA-Mediated Gene Silencing Signals Are Not Graft Transmissible from the Rootstock to the Scion in Greenhouse-Grown Apple Plants *Malus* sp.

## Supplementary Information

**Figure S1.** Molecular evaluation of *hrp-gusA* transgenic apple clones by PCR (A) and RT-PCR; (B) on genomic DNA and cDNA, respectively. H<sub>2</sub>O, blank probe; plasmid, positive control pHELLSGATE::*hrp-gusA* (the vector PCR 2.1 Topo containing a genomic clone of EF1alpha was used as control for the EF1a RT-PCR), PinS, descendent of the cultivar “inova”. Transgenic clone T667 was separately tested by RT-PCR (data not presented).

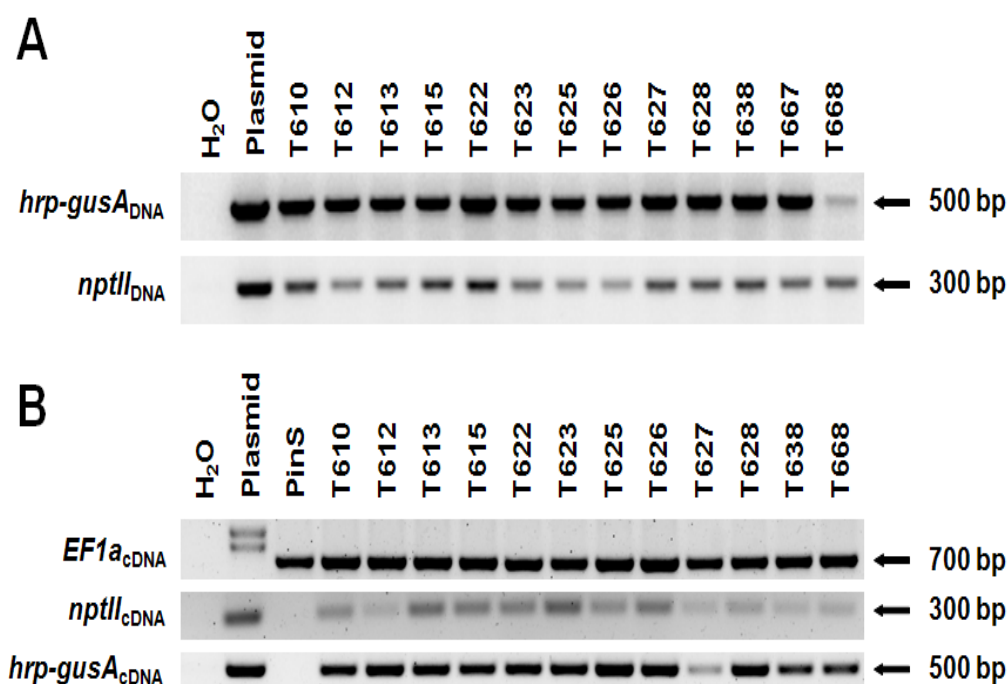

**Figure S2.** Molecular evaluation of *hrp-Mdans* transgenic plants. (A) PCR based detection of the *hrp-Mdans* hairpin gene construct on genomic DNA using the primers HG1 and HG3n; (B) Southern blot hybridization of *Sac*I digested DNA using a DIG-labeled probe of the *nptII*; (C) Relative mRNA expression of the *Mdans* gene measured on *in vitro* grown plants (mean of three biological replicates, each with three technical replicates); (D) Relative mRNA expression of the *Mdans* gene measured on greenhouse grown plants (mean of three biological replicates, each with three technical replicates). SM, molecular size marker (100 bp DNA ladder, MBI Fermentas); MW, 1 kbp, molecular weight marker II, DIG labelled (Roche); “PinS”, descendant of the apple cultivar “Pinova”.

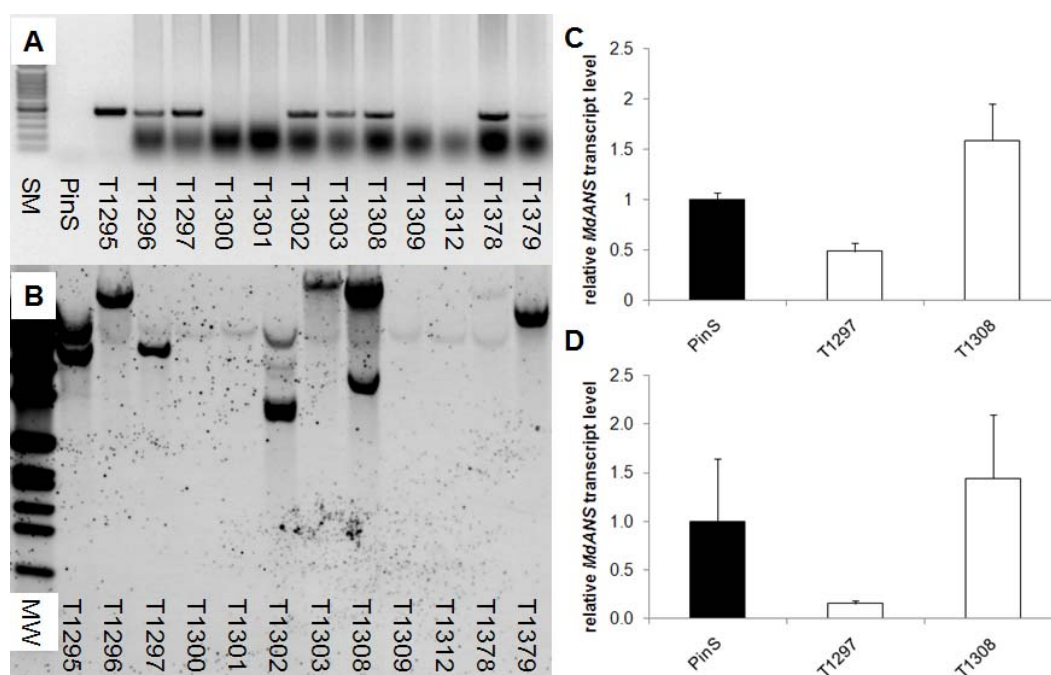

Supplement: Supplementary file 1 [file ijms-13-09992-s001.pdf]
